# Supplementary material for: Associations between novel triglyceride-glucose-related indices and the incidence of hypertension among Chinese middle-aged and elderly adults: a nationwide prospective cohort study
Source: Research Square preprint supplement (doi:10.21203/rs.3.rs-7471855/v1), 2025-09-05
Supplement: Supplementary file 1 [file 4dd9094c10ffba3f02383e27.docx]

**Table S1 VIF values for covariates in Cox regression Models 2 and 3**

| Model2  variable | Value | Model3  Variable | Value |
| --- | --- | --- | --- |
| Residence | 1.075596 | Residence | 1.077199 |
| BMI | 1.160498 | BMI | 1.179834 |
| Drink now | 1.385264 | Drink now | 1.386207 |
| Drink Former | 1.107049 | Drink  former | 1.109862 |
| Smoke now | 1.605883 | Smoke  now | 1.611825 |
| Smoke  former | 1.204410 | Smoke  former | 1.212997 |
| FBG | 1.707427 | FBG | 2.345772 |
| Scr | 3.823826 | Scr | 3.870457 |
| BUN | 1.116402 | BUN | 1.118859 |
| HDL-C | 1.145388 | HDL-C | 1.344050 |
| Hb1Ac | 1.699333 | Hb1Ac | 1.705309 |
| eGFR | 3.351640 | eGFR | 3.420042 |
| Middle school and high school | 1.179619 | Middle school and high school | 1.180482 |
| College or higher | 1.034679 | College or higher | 1.035067 |
| Marry | 1.031443 | Marry | 1.033229 |
|  |  | Kidney disease | 1.056129 |
|  |  | Dyslipidemia | 1.285137 |
|  |  | Heart disease | 1.044775 |
|  |  | Stroke | 1.010012 |
|  |  | Diabetes | 1.694619 |

Age and sex were treated as fixed covariates.

BMI: body mass index, SBP: systolic blood pressure, DBP: diastolic blood pressure,eGFR: estimated glomerular filtration rate, FBG: fasting blood glucose, TG: triglycerides, Scr: serum creatinine,UA:uric acid, BUN: blood urea nitrogen LDL-C: low-density lipoprotein cholesterol,HDL-C: high-density lipoprotein cholesterol, HbA1C: glycated hemoglobin, ,TC: total cholesterol,

**Table S2** **The baseline characteristics of participants according to TyG-BRI quartile**

|  | **[ALL]** | **Q1** | **Q2** | **Q3** | **Q4** | **p.overall** |
| --- | --- | --- | --- | --- | --- | --- |
| Variables | ***N=3150*** | ***N=788*** | ***N=787*** | ***N=787*** | ***N=788*** |  |
| Age,years | 57.00 [51.00;63.00] | 57.00 [51.00;64.00] | 57.00 [51.00;64.00] | 57.00 [51.00;62.00] | 57.00 [51.00;63.00] | 0.598 |
| Gender,n% |  |  |  |  |  | <0.001 |
| Male | 1489 (47.27%) | 530 (67.26%) | 428 (54.38%) | 330 (41.93%) | 201 (25.51%) |  |
| Female | 1661 (52.73%) | 258 (32.74%) | 359 (45.62%) | 457 (58.07%) | 587 (74.49%) |  |
| Marry,n% |  |  |  |  |  | 0.127 |
| Yes | 2733 (86.76%) | 688 (87.31%) | 669 (85.01%) | 699 (88.82%) | 677 (85.91%) |  |
| Education,n% |  |  |  |  |  | 0.331 |
| Below middle school | 2198 (69.78%) | 547 (69.42%) | 535 (67.98%) | 543 (69.00%) | 573 (72.72%) |  |
| Middle school and high school | 921 (29.24%) | 235 (29.82%) | 241 (30.62%) | 235 (29.86%) | 210 (26.65%) |  |
| College or higher | 31 (0.98%) | 6 (0.76%) | 11 (1.40%) | 9 (1.14%) | 5 (0.63%) |  |
| Residence,n% |  |  |  |  |  | <0.001 |
| Urban | 916 (29.08%) | 172 (21.83%) | 218 (27.70%) | 260 (33.04%) | 266 (33.76%) |  |
| Rural | 2234 (70.92%) | 616 (78.17%) | 569 (72.30%) | 527 (66.96%) | 522 (66.24%) |  |
| BMI (kg/m2) | 22.44 [20.34;24.74] | 19.73 [18.57;20.89] | 21.71 [20.29;23.01] | 23.39 [21.94;24.73] | 26.19 [24.39;28.10] | 0.000 |
| Drinking,n% |  |  |  |  |  | <0.001 |
| Never | 1879 (59.65%) | 394 (50.00%) | 442 (56.16%) | 484 (61.50%) | 559 (70.94%) |  |
| Current | 1049 (33.30%) | 332 (42.13%) | 281 (35.71%) | 255 (32.40%) | 181 (22.97%) |  |
| Former | 222 (7.05%) | 62 (7.87%) | 64 (8.13%) | 48 (6.10%) | 48 (6.09%) |  |
| Smoking,n% |  |  |  |  |  | <0.001 |
| Never | 1915 (60.79%) | 343 (43.53%) | 442 (56.16%) | 524 (66.58%) | 606 (76.90%) |  |
| Now | 1000 (31.75%) | 389 (49.37%) | 283 (35.96%) | 200 (25.41%) | 128 (16.24%) |  |
| Former | 235 (7.46%) | 56 (7.11%) | 62 (7.88%) | 63 (8.01%) | 54 (6.85%) |  |
| Diabetes,n%: |  |  |  |  |  | <0.001 |
| No | 2757 (87.52%) | 731 (92.77%) | 714 (90.72%) | 682 (86.66%) | 630 (79.95%) |  |
| Yes | 393 (12.48%) | 57 (7.23%) | 73 (9.28%) | 105 (13.34%) | 158 (20.05%) |  |
| Dyslipidemia,n%: |  |  |  |  |  | <0.001 |
| No | 1845 (58.57%) | 617 (78.30%) | 524 (66.58%) | 403 (51.21%) | 301 (38.20%) |  |
| Yes | 1305 (41.43%) | 171 (21.70%) | 263 (33.42%) | 384 (48.79%) | 487 (61.80%) |  |
| Heart disease,n%: |  |  |  |  |  | 0.048 |
| No | 2862 (90.86%) | 733 (93.02%) | 715 (90.85%) | 713 (90.60%) | 701 (88.96%) |  |
| Yes | 288 (9.14%) | 55 (6.98%) | 72 (9.15%) | 74 (9.40%) | 87 (11.04%) |  |
| Kidney disease,n% |  |  |  |  |  | 0.367 |
| No | 2891 (91.78%) | 724 (91.88%) | 711 (90.34%) | 726 (92.25%) | 730 (92.64%) |  |
| Yes | 259 (8.22%) | 64 (8.12%) | 76 (9.66%) | 61 (7.75%) | 58 (7.36%) |  |
| Stroke,n% |  |  |  |  |  | 0.019 |
| No | 3105 (98.57%) | 774 (98.22%) | 783 (99.49%) | 778 (98.86%) | 770 (97.72%) |  |
| Yes | 45 (1.43%) | 14 (1.78%) | 4 (0.51%) | 9 (1.14%) | 18 (2.28%) |  |
| eGFR | 100.80 [93.42;110.16] | 97.02 [90.90;106.78] | 100.08 [92.88;108.72] | 101.16 [94.32;110.25] | 104.49 [96.48;116.28] | <0.001 |
| FBG (mg/dl) | 97.35 [69.92;139.83] | 74.34 [57.53;98.46] | 87.61 [65.93;120.36] | 106.20 [78.76;147.79] | 132.31 [97.35;199.12] | <0.001 |
| TG (mg/dl) | 100.06 [91.17;106.19] | 100.60 [92.84;106.84] | 100.25 [91.89;106.26] | 100.06 [90.93;106.61] | 99.14 [89.57;104.88] | 0.003 |
| Scr (mg/dl) | 0.75 [0.64;0.87] | 0.78 [0.67;0.89] | 0.76 [0.64;0.86] | 0.73 [0.63;0.86] | 0.72 [0.63;0.82] | <0.001 |
| UA (mg/dl) | 4.13 [3.47;4.92] | 4.13 [3.48;4.87] | 4.07 [3.45;4.91] | 4.12 [3.43;4.98] | 4.19 [3.51;4.93] | 0.588 |
| BUN (mg/dl) | 15.15 [12.56;18.04] | 15.83 [13.08;18.85] | 15.15 [12.55;18.18] | 15.07 [12.49;17.95] | 14.61 [12.32;17.21] | <0.001 |
| LDL-C (mg/dl) | 112.11 [92.40;134.15] | 105.35 [88.82;124.49] | 109.02 [90.85;130.67] | 115.59 [95.49;138.21] | 118.88 [95.78;140.72] | <0.001 |
| HDL-C (mg/dl) | 51.42 [41.75;61.47] | 57.22 [48.71;67.65] | 53.74 [44.46;63.79] | 49.48 [40.79;58.38] | 44.85 [37.11;54.12] | <0.001 |
| HbA1c (%) | 5.10 [4.90;5.40] | 5.10 [4.80;5.30] | 5.10 [4.80;5.30] | 5.10 [4.90;5.40] | 5.20 [5.00;5.60] | <0.001 |
| TC (mg/dl) | 187.69 [165.08;211.47] | 178.22 [159.57;202.68] | 184.79 [162.76;207.60] | 190.98 [166.24;213.98] | 196.78 [174.36;221.14] | <0.001 |
| TyG | 8.50 [8.15;8.90] | 8.20 [7.94;8.51] | 8.40 [8.08;8.72] | 8.60 [8.29;8.97] | 8.88 [8.50;9.32] | <0.001 |
| BRI | 3.77 [3.03;4.67] | 2.60 [2.32;2.83] | 3.40 [3.20;3.62] | 4.17 [3.93;4.44] | 5.40 [4.99;6.00] | 0.000 |
| TyG-BRI | 32.20 [25.22;40.62] | 21.61 [19.02;23.40] | 28.72 [26.97;30.30] | 35.98 [34.11;38.17] | 48.05 [43.85;54.17] | 0.000 |
| ABSI | 0.08 [0.08;0.09] | 0.08 [0.08;0.08] | 0.08 [0.08;0.08] | 0.08 [0.08;0.09] | 0.08 [0.08;0.09] | <0.001 |
| TyG-ABSI | 0.70 [0.66;0.75] | 0.65 [0.62;0.69] | 0.69 [0.65;0.72] | 0.72 [0.68;0.76] | 0.76 [0.72;0.81] | <0.001 |
| WWI | 11.00 [10.49;11.56] | 10.28 [9.96;10.57] | 10.80 [10.49;11.14] | 11.20 [10.90;11.56] | 11.76 [11.41;12.20] | 0.000 |
| TyG-WWI | 94.00 [87.28;101.25] | 84.40 [80.66;88.18] | 91.01 [87.30;95.15] | 96.82 [92.69;101.86] | 104.58 [100.12;111.14] | 0.000 |
| CVAI | 84.09 [60.79;110.42] | 47.47 [34.27;60.79] | 72.63 [61.81;84.73] | 96.06 [84.16;110.38] | 125.29 [109.27;144.40] | 0.000 |
| TyG-CVAI | 710.93 [503.95;970.76] | 392.30 [275.40;501.52] | 616.28 [518.30;719.74] | 834.60 [709.54;972.79] | 1113.16 [954.16;1325.64] | 0.000 |
| SBP(mmHg) | 118.33 [109.67;127.00] | 115.67 [107.58;125.00] | 117.00 [108.67;125.33] | 118.67 [110.00;127.33] | 122.00 [113.33;129.33] | <0.001 |
| DBP(mmHg) | 70.33 [64.00;76.33] | 68.67 [62.00;75.33] | 69.33 [62.67;75.33] | 70.33 [64.50;76.33] | 72.67 [66.33;78.67] | <0.001 |

Continuous variables were presented as median (IQR), and categorical variables were presented as number (percentage). Statistical comparisons were performed using Mann-Whitney test (for continuous variables) or Chi-square test (for categorical variables)

BMI: body mass index, SBP: systolic blood pressure, DBP: diastolic blood pressure,eGFR: estimated glomerular filtration rate, FBG: fasting blood glucose, TG: triglycerides, Scr: serum creatinine,UA:uric acid, BUN: blood urea nitrogen LDL-C: low-density lipoprotein cholesterol,HDL-C: high-density lipoprotein cholesterol, HbA1C: glycated hemoglobin, ,TC: total cholesterol, TyG: triglyceride-glucose index, BRI: body roundness index, ABSI: a body shape index, WWI: weight-adjusted waist index, CVAI: Chinese visceral adiposity index, TyG-BRI: triglyceride-glucose index-body roundness index, TyG-ABSI: triglyceride-glucose index-a body shape index, TyG-WWI: triglyceride-glucose index-weight-adjusted waist index, TyG-CVAI: triglyceride-glucose index-Chinese visceral adiposity index.

**Table S3**  **The baseline characteristics of participants according to TyG-ABSI quartile**

|  | **[ALL]** | **Q1** | **Q2** | **Q3** | **Q4** | **p.overall** |
| --- | --- | --- | --- | --- | --- | --- |
| Variables | ***N=3150*** | ***N=788*** | ***N=787*** | ***N=787*** | ***N=788*** |  |
| Age,years | 57.00 [51.00;63.00] | 55.00 [48.00;61.00] | 57.00 [51.00;63.00] | 57.00 [52.00;64.00] | 59.00 [53.75;65.00] | <0.001 |
| Gender,n% |  |  |  |  |  | <0.001 |
| Male | 1489 (47.27%) | 415 (52.66%) | 410 (52.10%) | 364 (46.25%) | 300 (38.07%) |  |
| Female | 1661 (52.73%) | 373 (47.34%) | 377 (47.90%) | 423 (53.75%) | 488 (61.93%) |  |
| Marry,n% |  |  |  |  |  | 0.845 |
| Yes | 2733 (86.76%) | 688 (87.31%) | 686 (87.17%) | 682 (86.66%) | 677 (85.91%) |  |
| Education,n% |  |  |  |  |  | 0.102 |
| Below middle school | 2198 (69.78%) | 529 (67.13%) | 545 (69.25%) | 549 (69.76%) | 575 (72.97%) |  |
| Middle school and high school | 921 (29.24%) | 250 (31.73%) | 237 (30.11%) | 226 (28.72%) | 208 (26.40%) |  |
| College or higher | 31 (0.98%) | 9 (1.14%) | 5 (0.64%) | 12 (1.52%) | 5 (0.63%) |  |
| Residence,n% |  |  |  |  |  | 0.031 |
| Urban | 916 (29.08%) | 207 (26.27%) | 229 (29.10%) | 221 (28.08%) | 259 (32.87%) |  |
| Rural | 2234 (70.92%) | 581 (73.73%) | 558 (70.90%) | 566 (71.92%) | 529 (67.13%) |  |
| BMI (kg/m2) | 22.44 [20.34;24.74] | 21.82 [20.07;23.74] | 22.16 [20.13;24.49] | 22.80 [20.47;25.11] | 23.15 [20.92;25.68] | <0.001 |
| Drinking,n% |  |  |  |  |  | <0.001 |
| Never | 1879 (59.65%) | 445 (56.47%) | 436 (55.40%) | 497 (63.15%) | 501 (63.58%) |  |
| Current | 1049 (33.30%) | 290 (36.80%) | 298 (37.87%) | 222 (28.21%) | 239 (30.33%) |  |
| Former | 222 (7.05%) | 53 (6.73%) | 53 (6.73%) | 68 (8.64%) | 48 (6.09%) |  |
| Smoking,n% |  |  |  |  |  | <0.001 |
| Never | 1915 (60.79%) | 462 (58.63%) | 447 (56.80%) | 475 (60.36%) | 531 (67.39%) |  |
| Now | 1000 (31.75%) | 273 (34.64%) | 283 (35.96%) | 240 (30.50%) | 204 (25.89%) |  |
| Former | 235 (7.46%) | 53 (6.73%) | 57 (7.24%) | 72 (9.15%) | 53 (6.73%) |  |
| Diabetes,n%: |  |  |  |  |  | <0.001 |
| No | 2757 (87.52%) | 747 (94.80%) | 728 (92.50%) | 706 (89.71%) | 576 (73.10%) |  |
| Yes | 393 (12.48%) | 41 (5.20%) | 59 (7.50%) | 81 (10.29%) | 212 (26.90%) |  |
| Dyslipidemia,n%: |  |  |  |  |  | <0.001 |
| No | 1845 (58.57%) | 655 (83.12%) | 553 (70.27%) | 409 (51.97%) | 228 (28.93%) |  |
| Yes | 1305 (41.43%) | 133 (16.88%) | 234 (29.73%) | 378 (48.03%) | 560 (71.07%) |  |
| Heart disease,n%: |  |  |  |  |  | 0.086 |
| No | 2862 (90.86%) | 724 (91.88%) | 724 (91.99%) | 715 (90.85%) | 699 (88.71%) |  |
| Yes | 288 (9.14%) | 64 (8.12%) | 63 (8.01%) | 72 (9.15%) | 89 (11.29%) |  |
| Kidney disease,n% |  |  |  |  |  | 0.669 |
| No | 2891 (91.78%) | 727 (92.26%) | 717 (91.11%) | 728 (92.50%) | 719 (91.24%) |  |
| Yes | 259 (8.22%) | 61 (7.74%) | 70 (8.89%) | 59 (7.50%) | 69 (8.76%) |  |
| Stroke,n% |  |  |  |  |  | 0.722 |
| No | 3105 (98.57%) | 778 (98.73%) | 773 (98.22%) | 778 (98.86%) | 776 (98.48%) |  |
| Yes | 45 (1.43%) | 10 (1.27%) | 14 (1.78%) | 9 (1.14%) | 12 (1.52%) |  |
| eGFR | 100.80 [93.42;110.16] | 95.58 [89.10;103.18] | 98.82 [92.52;106.74] | 101.34 [94.77;109.80] | 108.72 [99.36;125.82] | <0.001 |
| FBG (mg/dl) | 97.35 [69.92;139.83] | 63.72 [51.33;77.88] | 87.61 [70.80;107.53] | 110.62 [89.83;143.37] | 162.40 [115.71;233.86] | <0.001 |
| TG (mg/dl) | 100.06 [91.17;106.19] | 102.14 [94.64;107.95] | 100.44 [92.25;106.54] | 99.97 [91.43;105.74] | 97.35 [86.88;103.91] | <0.001 |
| Scr (mg/dl) | 0.75 [0.64;0.87] | 0.75 [0.63;0.86] | 0.76 [0.64;0.88] | 0.73 [0.63;0.87] | 0.75 [0.65;0.86] | 0.571 |
| UA (mg/dl) | 4.13 [3.47;4.92] | 4.04 [3.40;4.78] | 4.11 [3.44;4.89] | 4.10 [3.49;4.94] | 4.29 [3.54;5.13] | <0.001 |
| BUN (mg/dl) | 15.15 [12.56;18.04] | 15.77 [12.82;18.75] | 15.07 [12.76;18.12] | 14.87 [12.38;17.66] | 14.87 [12.44;17.60] | 0.001 |
| LDL-C (mg/dl) | 112.11 [92.40;134.15] | 105.16 [89.21;124.20] | 112.11 [93.75;132.99] | 116.37 [97.04;136.86] | 114.82 [90.75;139.95] | <0.001 |
| HDL-C (mg/dl) | 51.42 [41.75;61.47] | 57.99 [49.39;67.75] | 53.35 [44.85;62.24] | 48.33 [40.59;58.76] | 44.07 [35.57;54.99] | <0.001 |
| HbA1c (%) | 5.10 [4.90;5.40] | 5.00 [4.80;5.30] | 5.10 [4.85;5.30] | 5.10 [4.90;5.40] | 5.20 [4.90;5.60] | <0.001 |
| TC (mg/dl) | 187.69 [165.08;211.47] | 174.74 [156.48;198.33] | 184.41 [163.15;208.18] | 190.21 [168.94;212.82] | 199.10 [175.90;225.39] | <0.001 |
| TyG | 8.50 [8.15;8.90] | 8.03 [7.80;8.24] | 8.39 [8.18;8.58] | 8.66 [8.42;8.91] | 9.12 [8.79;9.58] | 0.000 |
| BRI | 3.77 [3.03;4.67] | 3.03 [2.53;3.67] | 3.52 [2.90;4.25] | 4.03 [3.36;4.86] | 4.63 [3.89;5.50] | <0.001 |
| TyG-BRI | 32.20 [25.22;40.62] | 24.04 [20.17;29.25] | 29.69 [24.56;35.59] | 35.16 [28.83;41.75] | 41.98 [35.36;51.39] | <0.001 |
| ABSI | 0.08 [0.08;0.09] | 0.08 [0.08;0.08] | 0.08 [0.08;0.08] | 0.08 [0.08;0.09] | 0.09 [0.08;0.09] | <0.001 |
| TyG-ABSI | 0.70 [0.66;0.75] | 0.63 [0.61;0.65] | 0.68 [0.67;0.69] | 0.72 [0.71;0.74] | 0.79 [0.77;0.82] | 0.000 |
| WWI | 11.00 [10.49;11.56] | 10.36 [9.99;10.71] | 10.82 [10.45;11.21] | 11.21 [10.81;11.64] | 11.72 [11.24;12.23] | <0.001 |
| TyG-WWI | 94.00 [87.28;101.25] | 83.22 [79.99;86.14] | 90.72 [88.19;93.38] | 97.05 [94.33;100.16] | 106.82 [102.87;111.86] | 0.000 |
| CVAI | 84.09 [60.79;110.42] | 57.59 [38.63;76.51] | 75.34 [58.38;97.11] | 93.63 [73.02;113.69] | 113.94 [90.40;137.13] | <0.001 |
| TyG-CVAI | 710.93 [503.95;970.76] | 458.49 [307.88;617.19] | 633.98 [487.54;814.19] | 813.08 [629.09;994.16] | 1042.14 [803.73;1276.46] | <0.001 |
| SBP(mmHg) | 118.33 [109.67;127.00] | 115.67 [107.92;123.75] | 117.33 [108.83;126.17] | 119.00 [110.33;128.00] | 121.00 [112.00;129.00] | <0.001 |
| DBP(mmHg) | 70.33 [64.00;76.33] | 69.00 [63.00;75.67] | 70.33 [62.67;75.67] | 70.67 [65.00;77.33] | 71.00 [65.33;77.00] | <0.001 |

Continuous variables were presented as median (IQR), and categorical variables were presented as number (percentage). Statistical comparisons were performed using Mann-Whitney test (for continuous variables) or Chi-square test (for categorical variables)

BMI: body mass index, SBP: systolic blood pressure, DBP: diastolic blood pressure,eGFR: estimated glomerular filtration rate, FBG: fasting blood glucose, TG: triglycerides, Scr: serum creatinine,UA:uric acid, BUN: blood urea nitrogen LDL-C: low-density lipoprotein cholesterol,HDL-C: high-density lipoprotein cholesterol, HbA1C: glycated hemoglobin, ,TC: total cholesterol, TyG: triglyceride-glucose index, BRI: body roundness index, ABSI: a body shape index, WWI: weight-adjusted waist index, CVAI: Chinese visceral adiposity index, TyG-BRI: triglyceride-glucose index-body roundness index, TyG-ABSI: triglyceride-glucose index-a body shape index, TyG-WWI: triglyceride-glucose index-weight-adjusted waist index, TyG-CVAI: triglyceride-glucose index-Chinese visceral adiposity index.

**Table S4** **The baseline characteristics of participants according to TyG-WWI quartile**

|  | **[ALL]** | **Q1** | **Q2** | **Q3** | **Q4** | **p.overall** |
| --- | --- | --- | --- | --- | --- | --- |
| Variables | ***N=3150*** | ***N=788*** | ***N=787*** | ***N=787*** | ***N=788*** |  |
| Age,years | 57.00 [51.00;63.00] | 55.00 [49.00;62.00] | 57.00 [50.00;63.00] | 57.00 [52.00;63.00] | 58.00 [52.00;65.00] | <0.001 |
| Gender,n% |  |  |  |  |  | <0.001 |
| Male | 1489 (47.27%) | 505 (64.09%) | 430 (54.64%) | 333 (42.31%) | 221 (28.05%) |  |
| Female | 1661 (52.73%) | 283 (35.91%) | 357 (45.36%) | 454 (57.69%) | 567 (71.95%) |  |
| Marry,n% |  |  |  |  |  | 0.385 |
| Yes | 2733 (86.76%) | 690 (87.56%) | 692 (87.93%) | 679 (86.28%) | 672 (85.28%) |  |
| Education,n% |  |  |  |  |  | <0.001 |
| Below middle school | 2198 (69.78%) | 516 (65.48%) | 532 (67.60%) | 549 (69.76%) | 601 (76.27%) |  |
| Middle school and high school | 921 (29.24%) | 262 (33.25%) | 248 (31.51%) | 227 (28.84%) | 184 (23.35%) |  |
| College or higher | 31 (0.98%) | 10 (1.27%) | 7 (0.89%) | 11 (1.40%) | 3 (0.38%) |  |
| Residence,n% |  |  |  |  |  | 0.071 |
| Urban | 916 (29.08%) | 210 (26.65%) | 215 (27.32%) | 241 (30.62%) | 250 (31.73%) |  |
| Rural | 2234 (70.92%) | 578 (73.35%) | 572 (72.68%) | 546 (69.38%) | 538 (68.27%) |  |
| BMI (kg/m2) | 22.44 [20.34;24.74] | 21.01 [19.49;22.89] | 22.16 [20.13;24.16] | 23.04 [20.92;25.17] | 24.10 [21.82;26.56] | <0.001 |
| Drinking,n% |  |  |  |  |  | <0.001 |
| Never | 1879 (59.65%) | 400 (50.76%) | 439 (55.78%) | 503 (63.91%) | 537 (68.15%) |  |
| Current | 1049 (33.30%) | 336 (42.64%) | 286 (36.34%) | 221 (28.08%) | 206 (26.14%) |  |
| Former | 222 (7.05%) | 52 (6.60%) | 62 (7.88%) | 63 (8.01%) | 45 (5.71%) |  |
| Smoking,n% |  |  |  |  |  | <0.001 |
| Never | 1915 (60.79%) | 388 (49.24%) | 441 (56.04%) | 497 (63.15%) | 589 (74.75%) |  |
| Now | 1000 (31.75%) | 338 (42.89%) | 290 (36.85%) | 225 (28.59%) | 147 (18.65%) |  |
| Former | 235 (7.46%) | 62 (7.87%) | 56 (7.12%) | 65 (8.26%) | 52 (6.60%) |  |
| Diabetes,n%: |  |  |  |  |  | <0.001 |
| No | 2757 (87.52%) | 750 (95.18%) | 721 (91.61%) | 703 (89.33%) | 583 (73.98%) |  |
| Yes | 393 (12.48%) | 38 (4.82%) | 66 (8.39%) | 84 (10.67%) | 205 (26.02%) |  |
| Dyslipidemia,n%: |  |  |  |  |  | <0.001 |
| No | 1845 (58.57%) | 657 (83.38%) | 540 (68.61%) | 417 (52.99%) | 231 (29.31%) |  |
| Yes | 1305 (41.43%) | 131 (16.62%) | 247 (31.39%) | 370 (47.01%) | 557 (70.69%) |  |
| Heart disease,n%: |  |  |  |  |  | 0.125 |
| No | 2862 (90.86%) | 720 (91.37%) | 729 (92.63%) | 705 (89.58%) | 708 (89.85%) |  |
| Yes | 288 (9.14%) | 68 (8.63%) | 58 (7.37%) | 82 (10.42%) | 80 (10.15%) |  |
| Kidney disease,n% |  |  |  |  |  | 0.703 |
| No | 2891 (91.78%) | 719 (91.24%) | 720 (91.49%) | 730 (92.76%) | 722 (91.62%) |  |
| Yes | 259 (8.22%) | 69 (8.76%) | 67 (8.51%) | 57 (7.24%) | 66 (8.38%) |  |
| Stroke,n% |  |  |  |  |  | 0.279 |
| No | 3105 (98.57%) | 774 (98.22%) | 776 (98.60%) | 781 (99.24%) | 774 (98.22%) |  |
| Yes | 45 (1.43%) | 14 (1.78%) | 11 (1.40%) | 6 (0.76%) | 14 (1.78%) |  |
| eGFR | 100.80 [93.42;110.16] | 95.58 [89.23;103.50] | 98.82 [92.52;106.92] | 101.70 [94.68;110.52] | 107.82 [99.18;124.20] | <0.001 |
| FBG (mg/dl) | 97.35 [69.92;139.83] | 63.72 [52.22;78.76] | 87.61 [69.03;109.74] | 109.74 [88.50;143.37] | 161.51 [115.05;231.21] | <0.001 |
| TG (mg/dl) | 100.06 [91.17;106.19] | 102.05 [93.79;107.52] | 100.44 [92.29;106.62] | 99.99 [90.59;105.77] | 97.92 [87.50;103.99] | <0.001 |
| Scr (mg/dl) | 0.75 [0.64;0.87] | 0.77 [0.66;0.88] | 0.76 [0.64;0.88] | 0.73 [0.63;0.85] | 0.72 [0.64;0.84] | <0.001 |
| UA (mg/dl) | 4.13 [3.47;4.92] | 4.12 [3.45;4.81] | 4.11 [3.46;4.93] | 4.12 [3.49;4.96] | 4.19 [3.48;5.00] | 0.566 |
| BUN (mg/dl) | 15.15 [12.56;18.04] | 15.85 [13.00;18.77] | 15.18 [12.62;18.12] | 14.79 [12.38;17.86] | 14.78 [12.41;17.35] | <0.001 |
| LDL-C (mg/dl) | 112.11 [92.40;134.15] | 104.00 [88.14;120.62] | 114.05 [94.33;132.99] | 115.98 [96.26;138.02] | 116.56 [91.24;140.72] | <0.001 |
| HDL-C (mg/dl) | 51.42 [41.75;61.47] | 58.38 [49.10;67.75] | 53.74 [44.85;62.63] | 49.10 [40.59;58.57] | 44.07 [35.95;54.22] | <0.001 |
| HbA1c (%) | 5.10 [4.90;5.40] | 5.00 [4.80;5.30] | 5.10 [4.80;5.30] | 5.20 [4.90;5.40] | 5.20 [4.90;5.60] | <0.001 |
| TC (mg/dl) | 187.69 [165.08;211.47] | 174.36 [155.41;197.55] | 185.95 [162.76;208.76] | 190.59 [168.17;212.24] | 200.45 [177.45;226.45] | <0.001 |
| TyG | 8.50 [8.15;8.90] | 8.04 [7.80;8.26] | 8.39 [8.15;8.60] | 8.65 [8.42;8.93] | 9.11 [8.76;9.57] | 0.000 |
| BRI | 3.77 [3.03;4.67] | 2.81 [2.41;3.26] | 3.49 [3.02;4.07] | 4.07 [3.49;4.80] | 5.01 [4.26;5.82] | <0.001 |
| TyG-BRI | 32.20 [25.22;40.62] | 22.59 [19.37;26.06] | 29.23 [25.35;33.85] | 35.56 [30.64;40.95] | 45.35 [38.52;53.18] | 0.000 |
| ABSI | 0.08 [0.08;0.09] | 0.08 [0.08;0.08] | 0.08 [0.08;0.08] | 0.08 [0.08;0.09] | 0.09 [0.08;0.09] | <0.001 |
| TyG-ABSI | 0.70 [0.66;0.75] | 0.63 [0.61;0.65] | 0.68 [0.67;0.70] | 0.72 [0.71;0.74] | 0.79 [0.76;0.82] | 0.000 |
| WWI | 11.00 [10.49;11.56] | 10.28 [9.95;10.56] | 10.81 [10.51;11.12] | 11.23 [10.90;11.61] | 11.81 [11.39;12.28] | 0.000 |
| TyG-WWI | 94.00 [87.28;101.25] | 83.13 [79.99;85.34] | 90.66 [88.90;92.32] | 97.14 [95.44;99.34] | 106.95 [103.58;111.86] | 0.000 |
| CVAI | 84.09 [60.79;110.42] | 53.28 [35.98;69.03] | 75.20 [60.44;92.72] | 93.86 [76.00;112.80] | 117.78 [96.55;138.44] | <0.001 |
| TyG-CVAI | 710.93 [503.95;970.76] | 427.47 [289.93;552.90] | 628.81 [505.67;786.47] | 814.61 [660.93;977.36] | 1072.37 [870.34;1285.47] | 0.000 |
| SBP(mmHg) | 118.33 [109.67;127.00] | 115.67 [107.67;124.33] | 117.67 [109.00;125.17] | 119.00 [110.00;128.67] | 121.00 [112.58;129.00] | <0.001 |
| DBP(mmHg) | 70.33 [64.00;76.33] | 69.00 [62.58;75.67] | 70.00 [63.33;75.67] | 70.67 [65.00;77.00] | 71.50 [65.33;77.33] | <0.001 |

Continuous variables were presented as median (IQR), and categorical variables were presented as number (percentage). Statistical comparisons were performed using Mann-Whitney test (for continuous variables) or Chi-square test (for categorical variables)

BMI: body mass index, SBP: systolic blood pressure, DBP: diastolic blood pressure,eGFR: estimated glomerular filtration rate, FBG: fasting blood glucose, TG: triglycerides, Scr: serum creatinine,UA:uric acid, BUN: blood urea nitrogen LDL-C: low-density lipoprotein cholesterol,HDL-C: high-density lipoprotein cholesterol, HbA1C: glycated hemoglobin, ,TC: total cholesterol, TyG: triglyceride-glucose index, BRI: body roundness index, ABSI: a body shape index, WWI: weight-adjusted waist index, CVAI: Chinese visceral adiposity index, TyG-BRI: triglyceride-glucose index-body roundness index, TyG-ABSI: triglyceride-glucose index-a body shape index, TyG-WWI: triglyceride-glucose index-weight-adjusted waist index, TyG-CVAI: triglyceride-glucose index-Chinese visceral adiposity index.

**Table S5** **The baseline characteristics of participants according to TyG-CVAI quartile**

|  | **[ALL]** | **Q1** | **Q2** | **Q3** | **Q4** | **p.overall** |
| --- | --- | --- | --- | --- | --- | --- |
| Variables | ***N=3150*** | ***N=788*** | ***N=787*** | ***N=787*** | ***N=788*** |  |
| Age,years | 57.00 [51.00;63.00] | 56.00 [49.00;62.00] | 56.00 [51.00;62.00] | 57.00 [52.00;63.00] | 59.00 [53.00;65.00] | <0.001 |
| Gender,n% |  |  |  |  |  | <0.001 |
| Male | 1489 (47.27%) | 483 (61.29%) | 367 (46.63%) | 287 (36.47%) | 352 (44.67%) |  |
| Female | 1661 (52.73%) | 305 (38.71%) | 420 (53.37%) | 500 (63.53%) | 436 (55.33%) |  |
| Marry,n% |  |  |  |  |  | 0.905 |
| Yes | 2733 (86.76%) | 679 (86.17%) | 683 (86.79%) | 682 (86.66%) | 689 (87.44%) |  |
| Education,n% |  |  |  |  |  | 0.582 |
| Below middle school | 2198 (69.78%) | 552 (70.05%) | 550 (69.89%) | 563 (71.54%) | 533 (67.64%) |  |
| Middle school and high school | 921 (29.24%) | 230 (29.19%) | 231 (29.35%) | 216 (27.45%) | 244 (30.96%) |  |
| College or higher | 31 (0.98%) | 6 (0.76%) | 6 (0.76%) | 8 (1.02%) | 11 (1.40%) |  |
| Residence,n% |  |  |  |  |  | <0.001 |
| Urban | 916 (29.08%) | 181 (22.97%) | 208 (26.43%) | 219 (27.83%) | 308 (39.09%) |  |
| Rural | 2234 (70.92%) | 607 (77.03%) | 579 (73.57%) | 568 (72.17%) | 480 (60.91%) |  |
| BMI (kg/m2) | 22.44 [20.34;24.74] | 19.79 [18.64;21.07] | 21.58 [20.14;22.99] | 23.40 [21.94;24.80] | 25.90 [24.11;28.00] | 0.000 |
| Drinking,n% |  |  |  |  |  | <0.001 |
| Never | 1879 (59.65%) | 409 (51.90%) | 478 (60.74%) | 512 (65.06%) | 480 (60.91%) |  |
| Current | 1049 (33.30%) | 326 (41.37%) | 254 (32.27%) | 222 (28.21%) | 247 (31.35%) |  |
| Former | 222 (7.05%) | 53 (6.73%) | 55 (6.99%) | 53 (6.73%) | 61 (7.74%) |  |
| Smoking,n% |  |  |  |  |  | <0.001 |
| Never | 1915 (60.79%) | 384 (48.73%) | 478 (60.74%) | 554 (70.39%) | 499 (63.32%) |  |
| Now | 1000 (31.75%) | 357 (45.30%) | 265 (33.67%) | 178 (22.62%) | 200 (25.38%) |  |
| Former | 235 (7.46%) | 47 (5.96%) | 44 (5.59%) | 55 (6.99%) | 89 (11.29%) |  |
| Diabetes,n%: |  |  |  |  |  | <0.001 |
| No | 2757 (87.52%) | 730 (92.64%) | 717 (91.11%) | 687 (87.29%) | 623 (79.06%) |  |
| Yes | 393 (12.48%) | 58 (7.36%) | 70 (8.89%) | 100 (12.71%) | 165 (20.94%) |  |
| Dyslipidemia,n%: |  |  |  |  |  | <0.001 |
| No | 1845 (58.57%) | 658 (83.50%) | 541 (68.74%) | 436 (55.40%) | 210 (26.65%) |  |
| Yes | 1305 (41.43%) | 130 (16.50%) | 246 (31.26%) | 351 (44.60%) | 578 (73.35%) |  |
| Heart disease,n%: |  |  |  |  |  | 0.003 |
| No | 2862 (90.86%) | 733 (93.02%) | 724 (91.99%) | 712 (90.47%) | 693 (87.94%) |  |
| Yes | 288 (9.14%) | 55 (6.98%) | 63 (8.01%) | 75 (9.53%) | 95 (12.06%) |  |
| Kidney disease,n% |  |  |  |  |  | 0.660 |
| No | 2891 (91.78%) | 720 (91.37%) | 727 (92.38%) | 716 (90.98%) | 728 (92.39%) |  |
| Yes | 259 (8.22%) | 68 (8.63%) | 60 (7.62%) | 71 (9.02%) | 60 (7.61%) |  |
| Stroke,n% |  |  |  |  |  | 0.103 |
| No | 3105 (98.57%) | 777 (98.60%) | 780 (99.11%) | 778 (98.86%) | 770 (97.72%) |  |
| Yes | 45 (1.43%) | 11 (1.40%) | 7 (0.89%) | 9 (1.14%) | 18 (2.28%) |  |
| eGFR | 100.80 [93.42;110.16] | 97.38 [90.90;106.47] | 98.46 [91.98;107.46] | 101.16 [94.50;109.44] | 106.20 [97.02;118.71] | <0.001 |
| FBG (mg/dl) | 97.35 [69.92;139.83] | 69.03 [54.65;86.73] | 86.73 [66.38;112.39] | 106.20 [82.31;142.49] | 151.78 [113.28;219.48] | <0.001 |
| TG (mg/dl) | 100.06 [91.17;106.19] | 102.28 [94.64;107.49] | 100.69 [92.73;106.72] | 99.03 [90.15;105.16] | 98.04 [87.41;104.42] | <0.001 |
| Scr (mg/dl) | 0.75 [0.64;0.87] | 0.76 [0.64;0.88] | 0.73 [0.63;0.85] | 0.73 [0.63;0.85] | 0.76 [0.66;0.87] | 0.001 |
| UA (mg/dl) | 4.13 [3.47;4.92] | 4.06 [3.46;4.82] | 4.00 [3.32;4.79] | 4.05 [3.42;4.78] | 4.44 [3.71;5.26] | <0.001 |
| BUN (mg/dl) | 15.15 [12.56;18.04] | 15.87 [13.15;18.74] | 15.07 [12.46;17.98] | 14.87 [12.35;17.76] | 14.86 [12.55;17.48] | <0.001 |
| LDL-C (mg/dl) | 112.11 [92.40;134.15] | 106.51 [88.43;124.87] | 109.79 [90.66;131.06] | 116.37 [98.00;139.18] | 117.14 [93.56;138.40] | <0.001 |
| HDL-C (mg/dl) | 51.42 [41.75;61.47] | 61.08 [52.19;71.62] | 54.12 [46.01;63.02] | 49.87 [41.75;57.60] | 40.98 [34.41;48.42] | <0.001 |
| HbA1c (%) | 5.10 [4.90;5.40] | 5.10 [4.80;5.30] | 5.10 [4.80;5.30] | 5.10 [4.90;5.40] | 5.20 [4.90;5.50] | <0.001 |
| TC (mg/dl) | 187.69 [165.08;211.47] | 180.35 [161.21;205.28] | 183.25 [160.05;207.22] | 190.21 [167.20;214.56] | 195.23 [172.04;218.43] | <0.001 |
| TyG | 8.50 [8.15;8.90] | 8.12 [7.89;8.40] | 8.38 [8.09;8.65] | 8.59 [8.36;8.91] | 9.01 [8.67;9.51] | <0.001 |
| BRI | 3.77 [3.03;4.67] | 2.68 [2.35;3.12] | 3.42 [3.04;3.91] | 4.12 [3.64;4.70] | 5.13 [4.48;5.87] | 0.000 |
| TyG-BRI | 32.20 [25.22;40.62] | 21.94 [19.12;25.19] | 28.76 [25.49;32.42] | 35.80 [31.94;40.30] | 46.40 [40.33;53.74] | 0.000 |
| ABSI | 0.08 [0.08;0.09] | 0.08 [0.08;0.08] | 0.08 [0.08;0.08] | 0.08 [0.08;0.09] | 0.08 [0.08;0.09] | <0.001 |
| TyG-ABSI | 0.70 [0.66;0.75] | 0.65 [0.62;0.68] | 0.69 [0.65;0.72] | 0.72 [0.68;0.75] | 0.76 [0.73;0.81] | <0.001 |
| WWI | 11.00 [10.49;11.56] | 10.41 [10.02;10.80] | 10.84 [10.46;11.31] | 11.18 [10.77;11.64] | 11.55 [11.07;11.98] | <0.001 |
| TyG-WWI | 94.00 [87.28;101.25] | 85.00 [80.76;88.96] | 91.12 [87.33;95.51] | 96.57 [92.34;101.45] | 103.97 [98.86;110.84] | 0.000 |
| CVAI | 84.09 [60.79;110.42] | 45.28 [33.78;53.54] | 72.70 [66.94;78.52] | 95.83 [89.62;102.91] | 130.39 [118.72;146.44] | 0.000 |
| TyG-CVAI | 710.93 [503.95;970.76] | 374.21 [269.35;437.76] | 611.49 [556.81;661.27] | 829.47 [771.11;894.75] | 1170.79 [1053.94;1339.69] | 0.000 |
| SBP(mmHg) | 118.33 [109.67;127.00] | 114.33 [106.67;124.08] | 116.67 [108.83;125.17] | 118.67 [110.00;127.33] | 122.50 [114.33;130.08] | <0.001 |
| DBP(mmHg) | 70.33 [64.00;76.33] | 68.33 [61.67;75.33] | 69.67 [63.50;75.67] | 70.67 [64.67;76.17] | 72.33 [66.33;78.67] | <0.001 |

Continuous variables were presented as median (IQR), and categorical variables were presented as number (percentage). Statistical comparisons were performed using Mann-Whitney test (for continuous variables) or Chi-square test (for categorical variables)

BMI: body mass index, SBP: systolic blood pressure, DBP: diastolic blood pressure,eGFR: estimated glomerular filtration rate, FBG: fasting blood glucose, TG: triglycerides, Scr: serum creatinine,UA:uric acid, BUN: blood urea nitrogen LDL-C: low-density lipoprotein cholesterol,HDL-C: high-density lipoprotein cholesterol, HbA1C: glycated hemoglobin, ,TC: total cholesterol, TyG: triglyceride-glucose index, BRI: body roundness index, ABSI: a body shape index, WWI: weight-adjusted waist index, CVAI: Chinese visceral adiposity index, TyG-BRI: triglyceride-glucose index-body roundness index, TyG-ABSI: triglyceride-glucose index-a body shape index, TyG-WWI: triglyceride-glucose index-weight-adjusted waist index, TyG-CVAI: triglyceride-glucose index-Chinese visceral adiposity index.

**Table S6 Cox regression analysis of TyG-related indices and the risk of new-onset hypertension**

**excluding individuals who had already developed hypertension at Wave 2 (2013)**

|  | Model I | P-valve | Model II | P-valve | Model III | P-valve |
| --- | --- | --- | --- | --- | --- | --- |
|  | HR (95% CI) |  | HR (95% CI) |  | HR (95% CI) |  |
| TyG-BRI  (per 1 SD) | 1.666  (1.445-1.921) | <0.001* | 1.670  (1.326-2.105) | <0.001* | 1.563  (1.236-1.977) | <0.001* |
| TyG-BRI  Quartile |  |  |  |  |  |  |
| Q1 | Ref |  | Ref |  | Ref |  |
| Q2 | 1.135  (0.876-1.471) | 0.338 | 1.125  (0.862-1.469) | 0.386 | 1.100  (0.842-1.437) | 0.485 |
| Q3 | 1.375  (1.073-1.762) | 0.011* | 1.353  (1.023-1.789) | 0.034* | 1.282  (0.967-1.700) | 0.084 |
| Q4 | 1.956  (1.545-2.477) | <0.001* | 1.873  (1.344-2.611) | <0.001* | 1.722  (1.228-2.413) | 0.002* |
| TyG-ABSI  (per 1 SD) | 1.286  (1.182-1.399) | <0.001* | 1.324  (1.180 -1.486) | <0.001* | 1.266  (1.120-1.431) | <0.001* |
| TyG-ABSI  Quartile |  |  |  |  |  |  |
| Q1 | Ref |  | Ref |  | Ref |  |
| Q2 | 1.558  (1.210- 2.005) | <0.001* | 1.528  (1.183-1.976) | 0.001* | 1.491  (1.153-1.929) | 0.002* |
| Q3 | 1.630  (1.264- 2.101) | <0.001* | 1.533  (1.178-1.994) | 0.001* | 1.448  (1.108-1.891) | 0.007* |
| Q4 | 1.941  (1.519- 2.278) | <0.001* | 1.732  (1.315-2.281) | <0.001* | 1.546  (1.161 -1.891) | 0.003* |
| TyG-WWI  (per 1 SD) | 1.346  (1.225-2.481) | <0.001* | 1.336  (1.184-1.508) | <0.001* | 1.275  (1.122-1.447) | <0.001* |
| TyG-WWI  Quartile |  |  |  |  |  |  |
| Q1 | Ref |  | Ref |  | Ref |  |
| Q2 | 1.522  (1.102-1.835) | 0.006* | 1.416  (1.094-1.832) | 0.008* | 1.375  (1.061-1.781) | 0.016* |
| Q3 | 1.507  (1.170-1.942) | <0.001* | 1.455  (1.117-1.895) | 0.005* | 1.391  (1.064-1.818) | 0.016* |
| Q4 | 2.028  (1.593-2.581) | <0.001* | 1.876  (1.420-2.479) | <0.001* | 1.697  (1.271-2.267) | <0.001* |
| TyG-CVAI  (per 1 SD) | 1.559  (1.406-1.728) | <0.001* | 1.565  (1.298-1.888) | <0.001* | 1.460  (1.202-1.774) | <0.001* |
| TyG-CVAI Quartile |  |  |  |  |  |  |
| Q1 | Ref |  | Ref |  | Ref |  |
| Q2 | 1.207  (0.927-1.571) | 0.162 | 1.184  (0.899-1.559) | 0.230 | 1.163  (0.883-1.533) | 0.283 |
| Q3 | 1.514  (1.173-1.954) | 0.001* | 1.479  (1.100 -1.988) | 0.009 | 1.419  (1.053-1.911) | 0.021* |
| Q4 | 2.288  (1.801-2.908) | <0.001* | 2.020  (1.420-2.872) | <0.001* | 1.808  (1.259-2.597) | 0.001* |

Model 1, unadjusted; Model 2, adjusted for age, gender, residence, BMI, BUN, Scr, HDL-c, eGFR, hba1c, FBG, Education level, Marital status, Smoking statues, Drinking statues; Model 3, adjusted for variables included in Model 2 and heart disease, diabetes, dyslipidemia, stroke, kidney disease

TyG-BRI: triglyceride-glucose index-body roundness index, TyG-ABSI: triglyceride-glucose index-a body shape index, TyG-WWI: triglyceride-glucose index-weight-adjusted waist index, TyG-CVAI: triglyceride-glucose index-Chinese visceral adiposity index.

**Table S7** **Cox regression analysis of TyG-related indices and the risk of new-onse hypertension among individuals using winsorized data**

|  | Model I | P-valve | Model II | P-valve | Model III | P-valve |
| --- | --- | --- | --- | --- | --- | --- |
|  | HR (95% CI) |  | HR (95% CI) |  | HR (95% CI) |  |
| TyG-BRI  (per 1 SD) | 1.246  (1.180-1.316) | <0.001* | 1.222  (1.193-1.333) | <0.001* | 1.186  (1.085-1.296) | <0.001* |
| TyG-BRI  Quartile |  |  |  |  |  |  |
| Q1 | Ref |  | Ref |  | Ref |  |
| Q2 | 1.255  (1.053-1.496) | 0.011* | 1.241  (1.035-1.488) | 0.019* | 1.227  (1.023-1.471) | 0.028* |
| Q3 | 1.321  (1.111-1.571) | 0.002* | 1.316  (1.083-1.599) | 0.006* | 1.266  (1.040-1.541) | 0.019* |
| Q4 | 1.831  (1.553-2.159) | <0.001* | 1.737  (1.379-2.188) | <0.001* | 1.630  (1.290-2.060) | <0.001* |
| TyG-ABSI  (per 1 SD) | 1.243  (1.177-1.314) | <0.001* | 1.192  (1.117 -1.274) | <0.001* | 1.159  (1.081-1.242) | <0.001* |
| TyG-ABSI  Quartile |  |  |  |  |  |  |
| Q1 | Ref |  | Ref |  | Ref |  |
| Q2 | 1.481  (1.239- 1.771) | <0.001* | 1.448  (1.208-1.735) | <0.001* | 1.423  (1.186-1.707) | <0.001* |
| Q3 | 1.751  (1.471- 2.086) | <0.001* | 1.661  (1.386-1.991) | <0.001* | 1.597  (1.330-1.918) | <0.001* |
| Q4 | 1.919  (1.616- 2.278) | <0.001* | 1.670  (1.378-2.025) | <0.001* | 1.546  (1.266 -1.888) | <0.001* |
| TyG-WWI  (per 1 SD) | 1.252  (1.185-1.323) | <0.001* | 1.201  (1.121-1.286) | <0.001* | 1.165  (1.083-1.253) | <0.001* |
| TyG-WWI  Quartile |  |  |  |  |  |  |
| Q1 | Ref |  | Ref |  | Ref |  |
| Q2 | 1.525  (1.278-1.819) | <0.001* | 1.512  (1.265-1.808) | <0.001* | 1.482  (1.239-1.773) | <0.001* |
| Q3 | 1.560  (1.308-1.861) | <0.001* | 1.495  (1.244-1.798) | <0.001* | 1.447  (1.201-1.744) | <0.001* |
| Q4 | 1.930  (1.628-2.288) | <0.001* | 1.703  (1.400-2.073) | <0.001* | 1.578  (1.288-1.935) | <0.001* |
| TyG-CVAI  (per 1 SD) | 1.308  (1.238-1.3) | <0.001* | 1.295  (1.174-1.428) | <0.001* | 1.242  (1.121-1.375) | <0.001* |
| TyG-CVAI Quartile |  |  |  |  |  |  |
| Q1 | Ref |  | Ref |  | Ref |  |
| Q2 | 1.126  (0.941-1.349) | 0.196 | 1.124  (0.931-1.358) | 0.225 | 1.107  (0.916-1.339) | 0.292 |
| Q3 | 1.458  (1.227-1.732) | <0.001* | 1.426  (1.165 -1.746) | <0.001* | 1.381  (1.126-1.694) | 0.002* |
| Q4 | 1.945  (1.650-2.293) | <0.001* | 1.740  (1.362-2.223) | <0.001* | 1.592  (1.238-2.047) | 0.001* |

Model 1, unadjusted; Model 2, adjusted for age, gender, residence, BMI, BUN, Scr, HDL-c, eGFR, hba1c, FBG, Education level, Marital status, Smoking statues, Drinking statues; Model 3, adjusted for variables included in Model 2 and heart disease, diabetes, dyslipidemia, stroke, kidney disease

TyG-BRI: triglyceride-glucose index-body roundness index, TyG-ABSI: triglyceride-glucose index-a body shape index, TyG-WWI: triglyceride-glucose index-weight-adjusted waist index, TyG-CVAI: triglyceride-glucose index-Chinese visceral adiposity index.

**Table S8. E-values for the association between TyG-related indices and new-onset hypertension in participants**

| E-value | E_value_point | E_value_lowerCI |
| --- | --- | --- |
| TyG-BRI | 2.04 | 1.56 |
| TyG-ABSI | 1.67 | 1.41 |
| TyG-WWI | 1.66 | 1.4 |
| TyG-CVAI | 1.98 | 1.58 |

E-values were calculated based on hazard ratios from the fully adjusted model (Model 3).

TyG-BRI: triglyceride-glucose index-body roundness index, TyG-ABSI: triglyceride-glucose index-a body shape index, TyG-WWI: triglyceride-glucose index-weight-adjusted waist index, TyG-CVAI: triglyceride-glucose index-Chinese visceral adiposity index.
